# Supplementary material for: Stabilizing lattice oxygen and interface chemistry of Ni-rich and Co-poor cathodes for high-energy lithium-ion batteries
Source: Royal Society of Chemistry journal article supplement (doi:10.1039/d2ta08969f), 2023-01-01
Supplement: d2ta08969f1.pdf [file d2ta08969f1.pdf]

## Stabilizing lattice oxygen and interface chemistry of Ni-rich and Co-poor cathodes for high-energy lithium-ion batteries

Wu Wei<sup>a,#</sup>, Zhihong Wang<sup>a,#</sup>, Liyun Yao<sup>a</sup>, Hao Jiang<sup>a,b\*</sup>, Chunzhong Li<sup>a,b</sup>

<sup>a</sup> Key Laboratory for Ultrafine Materials of Ministry of Education, School of Materials Science and Engineering, East China University of Science and Technology, Shanghai, 200237, China

<sup>b</sup> Shanghai Engineering Research Center of Hierarchical Nanomaterials, School of Chemical Engineering, East China University of Science and Technology, Shanghai, 200237, China

# These authors contributed equally to this work.

\* Correspondence authors.

E-mail: [jianghao@ecust.edu.cn](mailto:jianghao@ecust.edu.cn)

### Part 1 Supporting Figures

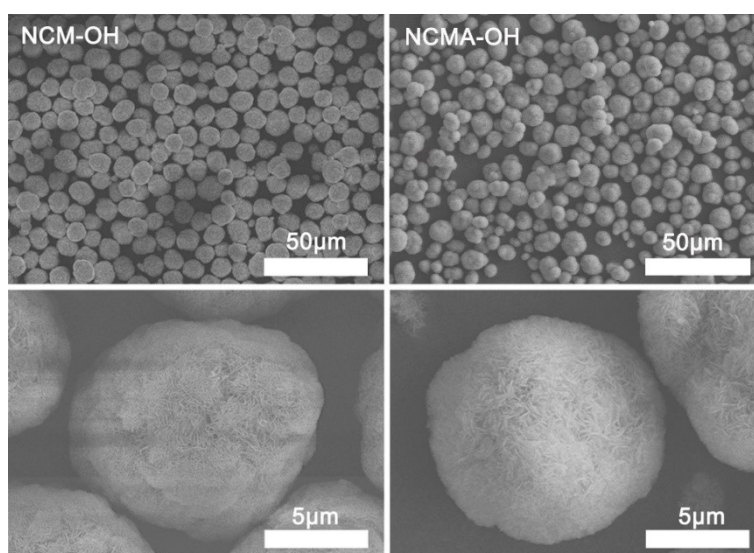

**Figure S1** The SEM images of precursors for NCM and NCMA.

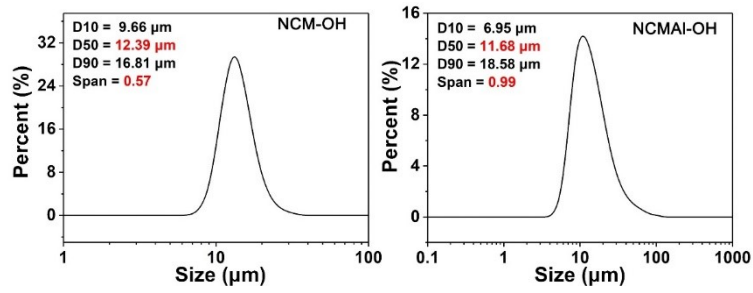

**Figure S2** Particles size distribution of precursors for NCM and NCMA.

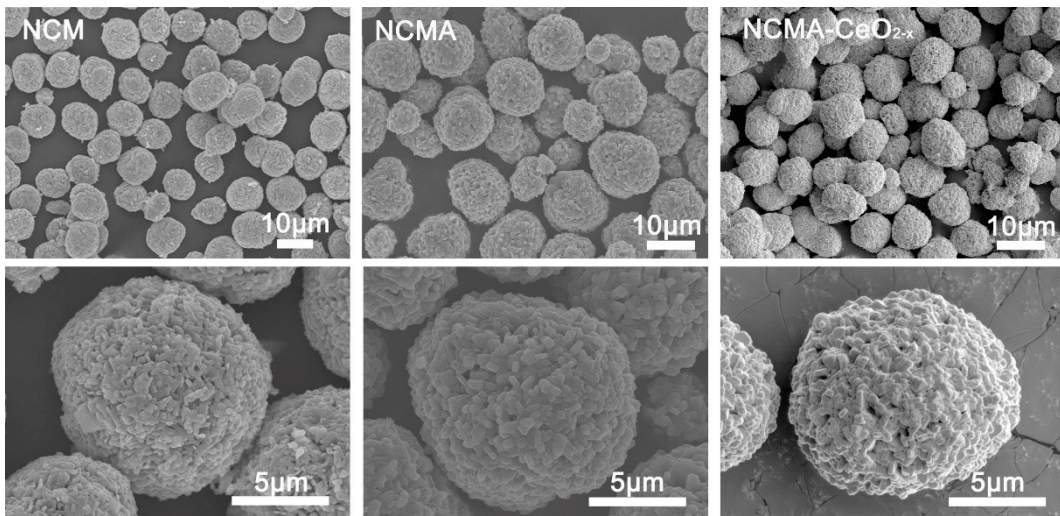

**Figure S3** SEM images of NCM, NCMA, and NCMA-CeO<sub>2-x</sub>.

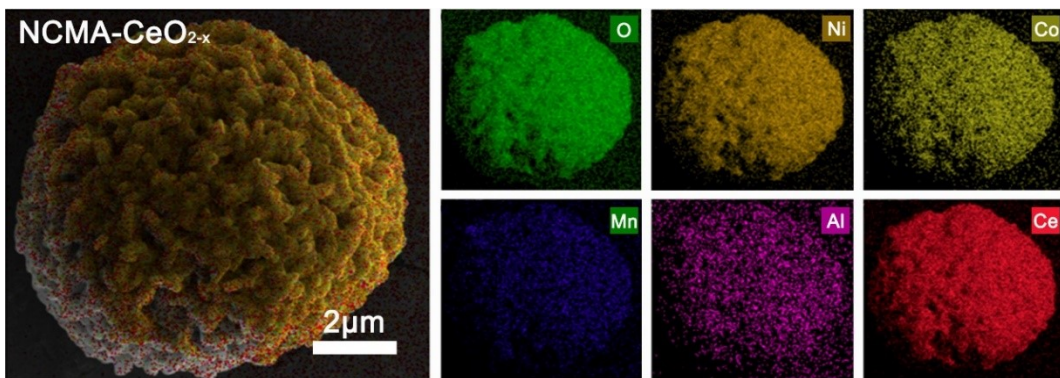

**Figure S4** SEM image and the corresponding EDS mapping for NCMA-CeO<sub>2-x</sub>.

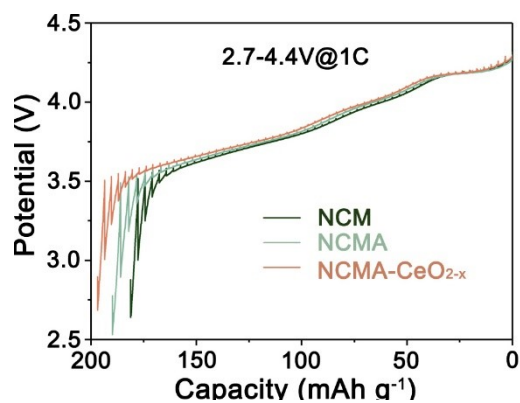

Figure S5 Discharge curves of GITT test.

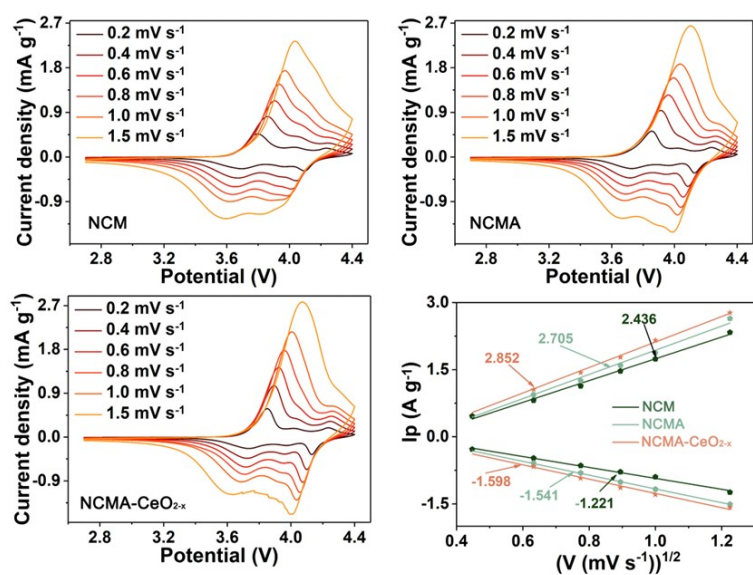

Figure S6 The CV curves from 0.2 to 1.5  $\text{mV s}^{-1}$  and linear relationship between the anodic/cathodic peak current ( $i_p$ ) and the square root of the scan rate ( $v^{1/2}$ ) for NCM, NCMA, NCMA- $\text{CeO}_{2-x}$ .

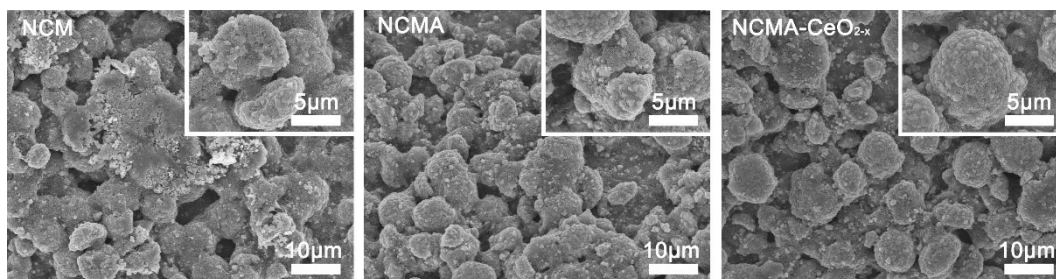

Figure S7 The SEM images of NCM, NCMA, NCMA- $\text{CeO}_{2-x}$  after 100 cycles.

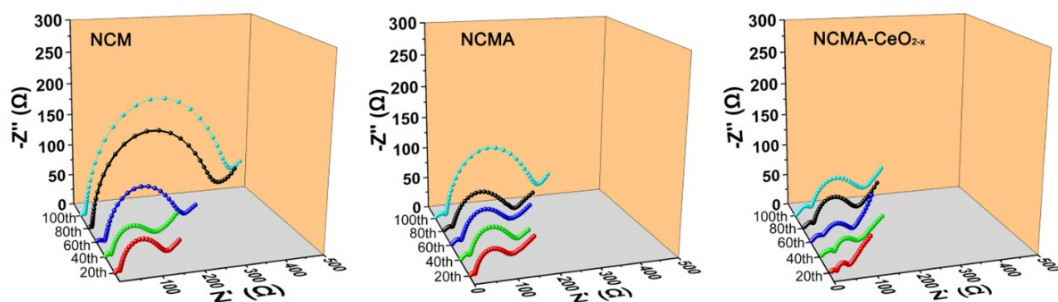

**Figure S8** Nyquist plots after different cycles of NCM, NCMA, NCMA-CeO<sub>2-x</sub>.

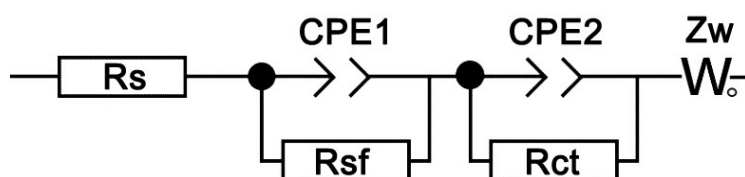

**Figure S9** The equivalent circuit for the EIS test

The first semicircle in the high-medium frequency range is caused by surface film resistances ( $R_{sf}$ ), while the second semicircle at the medium frequency is ascribed to the charge-transfer resistance ( $R_{ct}$ ) of the cathode.

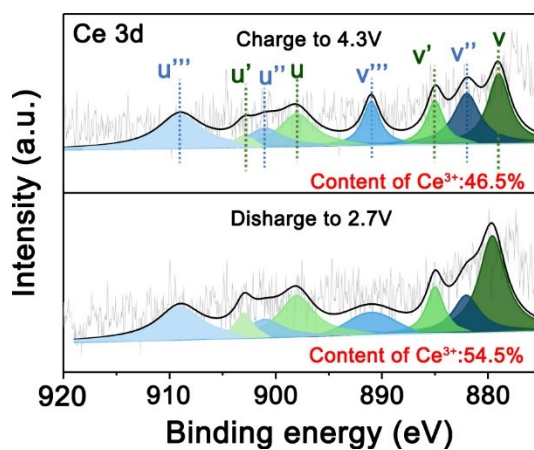

**Figure S10** Ce 3d peaks of XPS spectra for NCMA-CeO<sub>2-x</sub> at different potential.

## Part 2 Supporting Tables

**Table S1** Results of Rietveld refinements for NCM, NCMA, NCMA-CeO<sub>2-x</sub>.

| Lattice parameters |      |     |                    | Ni/Li | wR <sub>p</sub> | $\chi^2$ |
|--------------------|------|-----|--------------------|-------|-----------------|----------|
| a(Å)               | c(Å) | c/a | V(Å <sup>3</sup> ) |       |                 |          |

|                         |        |        |       |         |       |       |        |
|-------------------------|--------|--------|-------|---------|-------|-------|--------|
| NCM                     | 2.8702 | 14.198 | 4.946 | 101.292 | 3.89% | 5.16% | 0.8902 |
| NCMA                    | 2.8737 | 14.258 | 4.962 | 101.970 | 2.48% | 4.56% | 0.7332 |
| NCMA-CeO <sub>2-x</sub> | 2.8735 | 14.254 | 4.961 | 101.927 | 2.52% | 4.62% | 0.7832 |

**Table S2** Electrochemical performance of recent CeO<sub>2</sub> coating cathode materials reported in the literatures

| Modified cathode material                                                                   | Cutoff voltage (V) | Capacity at 0.1C (mAh g <sup>-1</sup> ) | Capacity at 10C (mAh g <sup>-1</sup> ) | Cycling (1C,100r) | Ref.             |
|---------------------------------------------------------------------------------------------|--------------------|-----------------------------------------|----------------------------------------|-------------------|------------------|
| <b>LiNi<sub>0.9</sub>Co<sub>0.045</sub>Mn<sub>0.045</sub>Al<sub>0.01</sub>O<sub>2</sub></b> | <b>2.7-4.4</b>     | <b>222</b>                              | <b>140</b>                             | <b>96.7%</b>      | <b>This work</b> |
| Li <sub>1.2</sub> Mn <sub>0.54</sub> Ni <sub>0.13</sub> Co <sub>0.13</sub> O <sub>2</sub>   | 2.0-4.8            | 260                                     | <100                                   | 86.9%             | 1                |
| LiNi <sub>0.8</sub> Co <sub>0.1</sub> Mn <sub>0.1</sub> O <sub>2</sub>                      | 2.75-4.5           | 205                                     | 146                                    | 86.9%             | 2                |
| LiNi <sub>0.9</sub> Co <sub>0.05</sub> Mn <sub>0.05</sub> O <sub>2</sub>                    | 2.8-4.3            | 215                                     | 125                                    | 93.3%             | 3                |
| Li <sub>1.13</sub> Ni <sub>0.2</sub> Mn <sub>0.47</sub> Co <sub>0.2</sub> O <sub>2</sub>    | 2.0-4.8            | 220                                     | <100                                   | <80%              | 4                |
| LiNi <sub>0.7</sub> Co <sub>0.2</sub> Mn <sub>0.1</sub> O <sub>2</sub>                      | 3.0-4.3            | 205                                     | 100                                    | 86.4%             | 5                |
| LiNi <sub>0.5</sub> Co <sub>0.2</sub> Mn <sub>0.3</sub> O <sub>2</sub>                      | 2.7-4.6            | 195                                     | 120                                    | 74.5%             | 6                |

## Reference

- [1] G. Hu, Z. Xue, Z. Luo, Z. Peng, Y. Cao, W. Wang, Y. Zeng, Y. Huang, Y. Tao, T. Li, Z. Zhang, K. Du, *Ceram. Int.*, 2019, **45**, 10633-10639.
- [2] F. Wu, Q. Li, L. Chen, Y. Lu, Y. Su, L. Bao, R. Chen, S. Chen, *ChemSusChem*, 2019, **12**, 935-943.
- [3] X. Zhang, G. Hu, K. Du, Z. Peng, W. Wang, C. Tan, Y. Wang, Y. Cao, *Ionics*, 2022. DOI: 10.1007/s11581-022-04832-9.
- [4] K. A. Kurilenko, O. A. Shlyakhtin, D. I. Petukhov, A. V. Garshev, R. G. Valeev, *J. Solid State Electr.*, 2019, **23**, 433-439.
- [5] S. Dong, Y. Zhou, C. Hai, J. Zeng, Y. Sun, Y. Shen, X. Li, X. Ren, G. Qi, X. Zhang, L. Ma, *Ceram. Int.*, 2019, **45**, 144-152.
- [6] H. Yi, L. Tan, L. Xia, L. Li, H. Li, Z. Liu, C. Wang, Z. Zhao, J. Duan, Z. Chen, *Adv. Powder Technol.*, 2021, **32**, 2493-2501.
